# Supplementary material for: P7C3-A20 Attenuates Microglial Inflammation and Brain Injury after ICH through Activating the NAD+/Sirt3 Pathway
Source: Hindawi journal article supplement (doi:10.1155/2023/7857760), 2023-02-08
Supplement: f1 [file 7857760.f1.pdf]

**Supplementary Table 1. Primers for RT-PCR.**

| Primers        |         | Sequence                       |
|----------------|---------|--------------------------------|
| NLRP3          | Forward | ATT ACC CGC CCG AGA AAG G      |
|                | Reverse | TCG CAG CAA AGA TCC ACA CAG    |
| Nfkb2          | Forward | TGGAACAGCCCAAACAGC             |
|                | Reverse | CACCTGGCAAACCTCCAT             |
| Ccl2           | Forward | TCCACGCCAATTCATCGTT            |
|                | Reverse | TCCCAGCCAGGTGTCATTTT           |
| IL1b           | Forward | CCAGAGATACAAAGAAATGATGG        |
|                | Reverse | ACTCCAGAAGACCAGAGGAAAT         |
| CD11b          | Forward | ACAGACAAACAGCCCAAACC           |
|                | Reverse | GCCTCACCCATCAGTTGTTT           |
| CD206          | Forward | CTCTGTTTCAGCTATTGGACGC         |
|                | Reverse | CGGAATTTCTGGGATTCAGCTTC        |
| INOS           | Forward | ATGGACCAGTATAAGGCAAGC          |
|                | Reverse | GCTCTGGATGAGCCTATATTG          |
| Arg1           | Forward | CTCCAAGCCAAAGTCCTTAGAG         |
|                | Reverse | AGGAGCTGTCATTAGGGACATC         |
| $\beta$ -actin | Forward | GTG CTA TGT TGC TCT AGA CTT CG |
|                | Reverse | ATG CCA CAG GAT TCC ATA CC     |
