# Supplementary material for: P7C3-A20 Attenuates Microglial Inflammation and Brain Injury after ICH through Activating the NAD+/Sirt3 Pathway
Source: Hindawi journal article supplement (doi:10.1155/2023/7857760), 2023-02-08
Supplement: f2 [file 7857760.f2.pdf]

**Supplementary Table 2. Statistical Table**

| Figure1 | n                        | Data structure          | Test used                                    | Statistic      | P value                                                                                                                   |
|---------|--------------------------|-------------------------|----------------------------------------------|----------------|---------------------------------------------------------------------------------------------------------------------------|
| 1B      | (-1, 1, 3, 7, 14d):      | Normal distribution     | 2-way repeated ANOVA,<br>Bonferroni post hoc | F(4, 25)=22.84 | P<0.0001                                                                                                                  |
|         | Sham=6                   |                         |                                              |                | Sham vs ICH p<0.0001                                                                                                      |
|         | ICH=6                    |                         |                                              |                | ICH vs ICH+P7C3-A20(5mg/kg)<br>p=0.4076                                                                                   |
|         | ICH+P7C3-A20(5mg/kg) =6  |                         |                                              |                | ICH vs ICH+P7C3-A20(10mg/kg)<br>p=0.0436                                                                                  |
|         | ICH+P7C3-A20(10mg/kg) =6 |                         |                                              |                | ICH vs ICH+P7C3-A20(20mg/kg)<br>p=0.0225                                                                                  |
|         | ICH+P7C3-A20(20mg/kg) =6 |                         |                                              |                | D3: ICH vs ICH+P7C3-A20(20mg/kg)<br>p=0.0263                                                                              |
|         |                          |                         |                                              |                | D7: ICH vs ICH+P7C3-A20(10mg/kg)<br>p=0.0230                                                                              |
|         |                          |                         |                                              |                | ICH vs ICH+P7C3-A20(20mg/kg)<br>p=0.0101<br>D14: ICH vs ICH+P7C3-A20(10mg/kg)<br>p=0.0347                                 |
| 1C      | (-1, 1, 3, 7, 14d):      | Normal distribution     | 2-way repeated ANOVA,<br>Bonferroni post hoc | F(4, 25)=23.81 | P<0.0001                                                                                                                  |
|         | Sham=6                   |                         |                                              |                | Sham vs ICH p<0.0001                                                                                                      |
|         | ICH=6                    |                         |                                              |                | ICH vs ICH+P7C3-A20(5mg/kg)<br>p=0.15651                                                                                  |
|         | ICH+P7C3-A20(5mg/kg) =6  |                         |                                              |                | ICH vs ICH+P7C3-A20(10mg/kg)<br>p=0.0418                                                                                  |
|         | ICH+P7C3-A20(10mg/kg) =6 |                         |                                              |                | ICH vs ICH+P7C3-A20(20mg/kg)<br>p=0.0212                                                                                  |
|         | ICH+P7C3-A20(20mg/kg) =6 |                         |                                              |                |                                                                                                                           |
|         |                          |                         |                                              |                |                                                                                                                           |
|         |                          |                         |                                              |                |                                                                                                                           |
| 1D      | (-1, 1, 3, 7, 14d):      | Non-normal distribution | 2-way repeated ANOVA,<br>Bonferroni post hoc | F(4, 25)=18.07 | P<0.0001                                                                                                                  |
|         | Sham=6                   |                         |                                              |                | Sham vs ICH p<0.0001                                                                                                      |
|         | ICH=6                    |                         |                                              |                | ICH vs ICH+P7C3-A20(5mg/kg)<br>p=0.6048                                                                                   |
|         | ICH+P7C3-A20(5mg/kg) =6  |                         |                                              |                | ICH vs ICH+P7C3-A20(10mg/kg)<br>p=0.0135                                                                                  |
|         | ICH+P7C3-A20(10mg/kg) =6 |                         |                                              |                | ICH vs ICH+P7C3-A20(20mg/kg)<br>p=0.0115                                                                                  |
|         | ICH+P7C3-A20(20mg/kg) =6 |                         |                                              |                | D3: ICH vs ICH+P7C3-A20(20mg/kg)<br>p=0.0222                                                                              |
|         |                          |                         |                                              |                | D7: ICH vs ICH+P7C3-A20(10mg/kg)<br>p=0.0178                                                                              |
|         |                          |                         |                                              |                | ICH vs ICH+P7C3-A20(20mg/kg)<br>p=0.0451<br>D14: ICH vs ICH+P7C3-A20(10mg/kg)<br>p=0.0322<br>ICH vs ICH+P7C3-A20(20mg/kg) |

|                |                                                                                                                        |                       |                                              |                  |                                                                                                                                                                                                                                                       |
|----------------|------------------------------------------------------------------------------------------------------------------------|-----------------------|----------------------------------------------|------------------|-------------------------------------------------------------------------------------------------------------------------------------------------------------------------------------------------------------------------------------------------------|
|                |                                                                                                                        |                       |                                              |                  | p=0.0311                                                                                                                                                                                                                                              |
| 1E             | (-1, 1, 3, 7, 14d):<br>Sham=6<br>ICH=6<br>ICH+P7C3-A20(5mg/kg)=6<br>ICH+P7C3-A20(10mg/kg)=6<br>ICH+P7C3-A20(20mg/kg)=6 | Normal distribution   | 2-way repeated ANOVA,<br>Bonferroni post hoc | F(4, 25)=26.11   | P<0.0001<br>Sham vs ICH p<0.0001<br>ICH vs ICH+P7C3-A20(5mg/kg) p=0.5571<br>ICH vs ICH+P7C3-A20(10mg/kg) p=0.0108<br>ICH vs ICH+P7C3-A20(20mg/kg) p=0.0368<br>D7: ICH vs ICH+P7C3-A20(20mg/kg) p=0.0306<br>D14: ICH vs ICH+P7C3-A20(10mg/kg) p=0.0363 |
| 1G             | ICH=6<br>ICH+P7C3-A20=6                                                                                                | Normal distribution   | t test                                       | t[10]=2.437      | P=0.0329                                                                                                                                                                                                                                              |
| 1H             | (Ipsilateral, Contralateral, Cerebellum):<br>Sham=6<br>ICH=6<br>ICH+P7C3-A20=6                                         | Normal distribution   | 2-way repeated ANOVA,<br>Bonferroni post hoc | F(2, 15)=28.74   | P<0.0001<br>Ipsilateral: Sham vs ICH p=0.0005<br>Sham vs ICH+P7C3-A20 p=0.0001<br>ICH vs ICH+P7C3-A20 p=0.0415                                                                                                                                        |
| <b>Figure2</b> | <b>n</b>                                                                                                               | <b>Data structure</b> | <b>Test used</b>                             | <b>Statistic</b> | <b>P value</b>                                                                                                                                                                                                                                        |
| 2B             | Sham=6<br>ICH=6<br>ICH+P7C3-A20=6                                                                                      | Normal distribution   | 1-way ANOVA,<br>Bonferroni post hoc          | F(2, 15)=69.01   | P<0.0001<br>Sham vs ICH p<0.0001<br>Sham vs ICH+P7C3-A20 p<0.0001<br>ICH vs ICH+P7C3-A20 p=0.0155                                                                                                                                                     |
| 2D             | Sham=6<br>ICH=6<br>ICH+P7C3-A20=6                                                                                      | Normal distribution   | 1-way ANOVA,<br>Bonferroni post hoc          | F(2, 15)=16.55   | P=0.0002<br>Sham vs ICH p=0.0001<br>Sham vs ICH+P7C3-A20 p=0.1055<br>ICH vs ICH+P7C3-A20 p=0.0118                                                                                                                                                     |
| 2E             | Sham=6<br>ICH=6<br>ICH+P7C3-A20=6                                                                                      | Normal distribution   | 1-way ANOVA,<br>Bonferroni post hoc          | F(2, 15)=14.70   | P=0.0003<br>Sham vs ICH p=0.0004<br>Sham vs ICH+P7C3-A20 p>0.9999<br>ICH vs ICH+P7C3-A20 p=0.0025                                                                                                                                                     |
| 2F             | Sham=6<br>ICH=6<br>ICH+P7C3-A20=6                                                                                      | Normal distribution   | 1-way ANOVA,<br>Bonferroni post hoc          | F(2, 15)=39.38   | P<0.0001<br>Sham vs ICH p<0.0001<br>Sham vs ICH+P7C3-A20 p=0.0003<br>ICH vs ICH+P7C3-A20 p=0.0067                                                                                                                                                     |
| 2H             | Sham=6<br>ICH=6<br>ICH+P7C3-A20=6                                                                                      | Normal distribution   | 1-way ANOVA,<br>Bonferroni post hoc          | F(2, 15)=73.49   | P<0.0001<br>Sham vs ICH p<0.0001<br>Sham vs ICH+P7C3-A20 p<0.0001<br>ICH vs ICH+P7C3-A20 p<0.0001                                                                                                                                                     |
| 2J             | Sham=6<br>ICH=6                                                                                                        | Normal distribution   | 1-way ANOVA,<br>Bonferroni post hoc          | F(2, 15)=90.40   | P<0.0001<br>Sham vs ICH p<0.0001                                                                                                                                                                                                                      |

|                |                                                                  |                            |                                                 |                      |  |                                                                                                                    |
|----------------|------------------------------------------------------------------|----------------------------|-------------------------------------------------|----------------------|--|--------------------------------------------------------------------------------------------------------------------|
|                | ICH+P7C3-A20=6                                                   |                            |                                                 |                      |  | Sham vs ICH+P7C3-A20 p<0.0001<br>ICH vs ICH+P7C3-A20 p<0.0001                                                      |
| 2K             | Sham=6<br>ICH=6<br>ICH+P7C3-A20=6                                | Normal distribution        | 1-way ANOVA,<br>Bonferroni post hoc             | F(2, 15)=33.58       |  | P<0.0001<br>Sham vs ICH p<0.0001<br>Sham vs ICH+P7C3-A20 p=0.0006<br>ICH vs ICH+P7C3-A20 p=0.0153                  |
| <b>Figure3</b> | <b>n</b>                                                         | <b>Data structure</b>      | <b>Test used</b>                                | <b>Statistic</b>     |  | <b>P value</b>                                                                                                     |
| 3E             | Sham=6<br>ICH=6<br>ICH+P7C3-A20=6                                | Normal distribution        | 1-way ANOVA,<br>Bonferroni post hoc             | F(2, 15)=30.41       |  | P<0.0001<br>Sham vs ICH p<0.0001<br>Sham vs ICH+P7C3-A20 p=0.0099<br>ICH vs ICH+P7C3-A20 p=0.0019                  |
| 3F             | Sham=6<br>ICH=6<br>ICH+P7C3-A20=6                                | Normal distribution        | 1-way ANOVA,<br>Bonferroni post hoc             | F(2, 15)=45.35       |  | P<0.0001<br>Sham vs ICH p<0.0001<br>Sham vs ICH+P7C3-A20 p=0.4617<br>ICH vs ICH+P7C3-A20 p<0.0001                  |
| 3G             | Sham=6<br>ICH=6<br>ICH+P7C3-A20=6                                | Non-normal<br>distribution | 1-way ANOVA,<br>Bonferroni post hoc             | F(2, 15)=94.06       |  | P<0.0001<br>Sham vs ICH p<0.0001<br>Sham vs ICH+P7C3-A20 p<0.0001<br>ICH vs ICH+P7C3-A20 p=0.0079                  |
| 3H             | Sham=6<br>ICH=6<br>ICH+P7C3-A20=6                                | Normal distribution        | 1-way ANOVA<br>with Welch's<br>correction       | W(2,<br>6.899)=234.4 |  | P<0.0001<br>Sham vs ICH p<0.0001<br>Sham vs ICH+P7C3-A20 p<0.0001<br>ICH vs ICH+P7C3-A20 p=0.0026                  |
| 3K             | Sham=20<br>ICH=20<br>ICH+P7C3-A20=20                             | Normal distribution        | 1-way ANOVA,<br>Bonferroni post hoc             | F(2, 15)=6.077       |  | P=0.0041<br>Sham vs ICH p=0.0058<br>Sham vs ICH+P7C3-A20 p>0.9999<br>ICH vs ICH+P7C3-A20 p=0.0262                  |
| 3L             | Sham=20<br>ICH=20<br>ICH+P7C3-A20=20                             | Normal distribution        | 1-way ANOVA,<br>Bonferroni post hoc             | F(2, 57)=10.72       |  | P=0.0001<br>Sham vs ICH p<0.0001<br>Sham vs ICH+P7C3-A20 p=0.1542<br>ICH vs ICH+P7C3-A20 p=0.0332                  |
| 3M             | Sham=20<br>ICH=20<br>ICH+P7C3-A20=20                             | Non-normal<br>distribution | 1-way ANOVA,<br>Bonferroni post hoc             | F(2, 57)=14.85       |  | P<0.0001<br>Sham vs ICH p<0.0001<br>Sham vs ICH+P7C3-A20 p=0.2121<br>ICH vs ICH+P7C3-A20 p=0.0026                  |
| 3N             | Sham=20<br>ICH=20<br>ICH+P7C3-A20=20                             | Normal distribution        | 1-way ANOVA<br>with Welch's<br>correction       | W(2,<br>35.09)=58.05 |  | P<0.0001<br>Sham vs ICH p<0.0001<br>Sham vs ICH+P7C3-A20 p=0.0546<br>ICH vs ICH+P7C3-A20 p<0.0001                  |
| <b>Figure4</b> | <b>n</b>                                                         | <b>Data structure</b>      | <b>Test used</b>                                | <b>Statistic</b>     |  | <b>P value</b>                                                                                                     |
| 4B             | Con: Vehicle=6<br>ICH=6<br>ICH+P7C3-A20=6<br>Sirt3 KO: Vehicle=6 | Normal distribution        | 2-way repeated<br>ANOVA,<br>Bonferroni post hoc | F(2, 15)=358.8       |  | P<0.0001<br>Con: Vehicle vs OxyHb p<0.0001<br>Vehicle vs OxyHb+P7C3-A20 p<0.0001<br>ICH vs OxyHb+P7C3-A20 p<0.0001 |

|                |                                 |                       |                     |                  |                                                                        |
|----------------|---------------------------------|-----------------------|---------------------|------------------|------------------------------------------------------------------------|
|                | ICH=6                           |                       |                     |                  | Sirt3 KO: Vehicle vs OxyHb p<0.0001                                    |
|                | ICH+P7C3-A20=6                  |                       |                     |                  | Vehicle vs OxyHb+P7C3-A20 p<0.0001<br>OxyHb vs OxyHb+P7C3-A20 p=0.1149 |
| 4D             | Con: Vehicle=6                  | Normal distribution   | 2-way repeated      | F(2, 15)=49.14   | P<0.0001                                                               |
|                | ICH=6                           |                       | ANOVA,              |                  | Con: Vehicle vs OxyHb p<0.0001                                         |
|                | ICH+P7C3-A20=6                  |                       | Bonferroni post hoc |                  | Vehicle vs OxyHb+P7C3-A20 p=0.4062                                     |
|                | Sirt3 KO: Vehicle=6             |                       |                     |                  | OxyHb vs OxyHb+P7C3-A20 p<0.0001                                       |
|                | ICH=6                           |                       |                     |                  | Sirt3 KO: Vehicle vs OxyHb p<0.0001                                    |
|                | ICH+P7C3-A20=6                  |                       |                     |                  | Vehicle vs OxyHb+P7C3-A20 p<0.0001<br>OxyHb vs OxyHb+P7C3-A20 p=0.5408 |
| 4F             | Con: Vehicle=6                  | Normal distribution   | 2-way repeated      | F(2, 15)=143.8   | P<0.0001                                                               |
|                | ICH=6                           |                       | ANOVA,              |                  | Con: Vehicle vs OxyHb p<0.0001                                         |
|                | ICH+P7C3-A20=6                  |                       | Bonferroni post hoc |                  | Vehicle vs OxyHb+P7C3-A20 p=0.0003                                     |
|                | Sirt3 KO: Vehicle=6             |                       |                     |                  | OxyHb vs OxyHb+P7C3-A20 p<0.0001                                       |
|                | ICH=6                           |                       |                     |                  | Sirt3 KO: Vehicle vs OxyHb p<0.0001                                    |
|                | ICH+P7C3-A20=6                  |                       |                     |                  | Vehicle vs OxyHb+P7C3-A20 p<0.0001<br>OxyHb vs OxyHb+P7C3-A20 p=0.6212 |
| 4G             | Con: Vehicle=6                  | Normal distribution   | 2-way repeated      | F(2, 15)=12.74   | P=0.0006                                                               |
|                | ICH=6                           |                       | ANOVA,              |                  | Con: Vehicle vs OxyHb p=0.0098                                         |
|                | ICH+P7C3-A20=6                  |                       | Bonferroni post hoc |                  | Vehicle vs OxyHb+P7C3-A20 p>0.9999                                     |
|                | Sirt3 KO: Vehicle=6             |                       |                     |                  | OxyHb vs OxyHb+P7C3-A20 p=0.0390                                       |
|                | ICH=6                           |                       |                     |                  | Sirt3 KO: Vehicle vs OxyHb p=0.0008                                    |
|                | ICH+P7C3-A20=6                  |                       |                     |                  | Vehicle vs OxyHb+P7C3-A20 p=0.4010<br>OxyHb vs OxyHb+P7C3-A20 p=0.0446 |
| 4H             | Con: Vehicle=6                  | Normal distribution   | 2-way repeated      | F(2, 15)=78.55   | P<0.0001                                                               |
|                | ICH=6                           |                       | ANOVA,              |                  | Con: Vehicle vs OxyHb p<0.0001                                         |
|                | ICH+P7C3-A20=6                  |                       | Bonferroni post hoc |                  | Vehicle vs OxyHb +P7C3-A20 p=0.0013                                    |
|                | Sirt3 KO: Vehicle=6             |                       |                     |                  | OxyHb vs OxyHb+P7C3-A20 p=0.0035                                       |
|                | ICH=6                           |                       |                     |                  | Sirt3 KO: Vehicle vs OxyHb p<0.0001                                    |
|                | ICH+P7C3-A20=6                  |                       |                     |                  | Vehicle vs OxyHb+P7C3-A20 p<0.0001<br>OxyHb vs OxyHb+P7C3-A20 p=0.2849 |
| 4I             | Con: Vehicle=6                  | Normal distribution   | 2-way repeated      | F(2, 15)=56.50   | P<0.0001                                                               |
|                | ICH=6                           |                       | ANOVA,              |                  | Con: Vehicle vs ICH p<0.0001                                           |
|                | ICH+P7C3-A20=6                  |                       | Bonferroni post hoc |                  | Vehicle vs OxyHb+P7C3-A20 p=0.0073                                     |
|                | Sirt3 KO: Vehicle=6             |                       |                     |                  | OxyHb vs OxyHb+P7C3-A20 p=0.0091                                       |
|                | ICH=6                           |                       |                     |                  | Sirt3 KO: Vehicle vs OxyHb p<0.0001                                    |
|                | ICH+P7C3-A20=6                  |                       |                     |                  | Vehicle vs OxyHb+P7C3-A20 p<0.0001<br>OxyHb vs OxyHb+P7C3-A20 p=0.4407 |
| <b>Figure5</b> | <b>n</b>                        | <b>Data structure</b> | <b>Test used</b>    | <b>Statistic</b> | <b>P value</b>                                                         |
| 5C             | Sirt3 <sup>fl/fl</sup> : Sham=6 | Normal distribution   | 2-way repeated      | F(2, 15)=44.82   | P<0.0001                                                               |
|                | ICH=6                           |                       | ANOVA,              |                  | Sirt3 <sup>fl/fl</sup> : Sham vs ICH p<0.0001                          |
|                | ICH+P7C3-A20=6                  |                       | Bonferroni post hoc |                  | Sham vs ICH+P7C3-A20 p=0.0005                                          |
|                | Sirt3 <sup>CKO</sup> : Sham=6   |                       |                     |                  | ICH vs ICH+P7C3-A20 p=0.0040                                           |
|                | ICH=6                           |                       |                     |                  | Sirt3 <sup>CKO</sup> : Sham vs ICH p<0.0001                            |

|                |                                                                                                                        |                       |                                              |                  |                                                                                                                                                                                                                                            |
|----------------|------------------------------------------------------------------------------------------------------------------------|-----------------------|----------------------------------------------|------------------|--------------------------------------------------------------------------------------------------------------------------------------------------------------------------------------------------------------------------------------------|
|                | ICH+P7C3-A20=6                                                                                                         |                       |                                              |                  | Sham vs ICH+P7C3-A20 p<0.0001<br>ICH vs ICH+P7C3-A20 p=0.1080                                                                                                                                                                              |
| 5D             | Sirt3 <sup>fl/fl</sup> ; Sham=6<br>ICH=6<br>ICH+P7C3-A20=6<br>Sirt3 <sup>CKO</sup> ; Sham=6<br>ICH=6<br>ICH+P7C3-A20=6 | Normal distribution   | 2-way repeated ANOVA,<br>Bonferroni post hoc | F(2, 15)=124.5   | P<0.0001<br>Sirt3 <sup>fl/fl</sup> ; Sham vs ICH p<0.0001<br>Sham vs ICH+P7C3-A20 p<0.0001<br>ICH vs ICH+P7C3-A20 p<0.0001<br>Sirt3 <sup>CKO</sup> ; Sham vs ICH p<0.0001<br>Sham vs ICH+P7C3-A20 p<0.0001<br>ICH vs ICH+P7C3-A20 p=0.0700 |
| 5E             | Sirt3 <sup>fl/fl</sup> ; Sham=6<br>ICH=6<br>ICH+P7C3-A20=6<br>Sirt3 <sup>CKO</sup> ; Sham=6<br>ICH=6<br>ICH+P7C3-A20=6 | Normal distribution   | 2-way repeated ANOVA,<br>Bonferroni post hoc | F(2, 15)=104.5   | P<0.0001<br>Sirt3 <sup>fl/fl</sup> ; Sham vs ICH p<0.0001<br>Sham vs ICH+P7C3-A20 p<0.0001<br>ICH vs ICH+P7C3-A20 p=0.0419<br>Sirt3 <sup>CKO</sup> ; Sham vs ICH p<0.0001<br>Sham vs ICH+P7C3-A20 p<0.0001<br>ICH vs ICH+P7C3-A20 p=0.1963 |
| <b>Figure6</b> | <b>n</b>                                                                                                               | <b>Data structure</b> | <b>Test used</b>                             | <b>Statistic</b> | <b>P value</b>                                                                                                                                                                                                                             |
| 6B             | Sirt3 <sup>fl/fl</sup> ; Sham=6<br>ICH=6<br>ICH+P7C3-A20=6<br>Sirt3 <sup>CKO</sup> ; Sham=6<br>ICH=6<br>ICH+P7C3-A20=6 | Normal distribution   | 2-way repeated ANOVA,<br>Bonferroni post hoc | F(2, 15)=48.89   | P<0.0001<br>Sirt3 <sup>fl/fl</sup> ; Sham vs ICH p<0.0001<br>Sham vs ICH+P7C3-A20 p=0.1471<br>ICH vs ICH+P7C3-A20 p=0.0067<br>Sirt3 <sup>CKO</sup> ; Sham vs ICH p<0.0001<br>Sham vs ICH+P7C3-A20 p=0.0011<br>ICH vs ICH+P7C3-A20 p=0.2014 |
| 6C             | Sirt3 <sup>fl/fl</sup> ; Sham=6<br>ICH=6<br>ICH+P7C3-A20=6<br>Sirt3 <sup>CKO</sup> ; Sham=6<br>ICH=6<br>ICH+P7C3-A20=6 | Normal distribution   | 2-way repeated ANOVA,<br>Bonferroni post hoc | F(2, 15)=42.48   | P<0.0001<br>Sirt3 <sup>fl/fl</sup> ; Sham vs ICH p<0.0001<br>Sham vs ICH+P7C3-A20 p=0.0144<br>ICH vs ICH+P7C3-A20 p=0.0016<br>Sirt3 <sup>CKO</sup> ; Sham vs ICH p<0.0001<br>Sham vs ICH+P7C3-A20 p<0.0001<br>ICH vs ICH+P7C3-A20 p=0.2530 |
| 6D             | Sirt3 <sup>fl/fl</sup> ; Sham=6<br>ICH=6<br>ICH+P7C3-A20=6<br>Sirt3 <sup>CKO</sup> ; Sham=6<br>ICH=6<br>ICH+P7C3-A20=6 | Normal distribution   | 2-way repeated ANOVA,<br>Bonferroni post hoc | F(2, 15)=474.6   | P<0.0001<br>Sirt3 <sup>fl/fl</sup> ; Sham vs ICH p<0.0001<br>Sham vs ICH+P7C3-A20 p<0.0001<br>ICH vs ICH+P7C3-A20 p=0.0014<br>Sirt3 <sup>CKO</sup> ; Sham vs ICH p<0.0001<br>Sham vs ICH+P7C3-A20 p<0.0001<br>ICH vs ICH+P7C3-A20 p=0.1978 |
| 6E             | Sirt3 <sup>fl/fl</sup> ; Sham=6<br>ICH=6<br>ICH+P7C3-A20=6<br>Sirt3 <sup>CKO</sup> ; Sham=6<br>ICH=6<br>ICH+P7C3-A20=6 | Normal distribution   | 2-way repeated ANOVA,<br>Bonferroni post hoc | F(2, 15)=154.5   | P<0.0001<br>Sirt3 <sup>fl/fl</sup> ; Sham vs ICH p<0.0001<br>Sham vs ICH+P7C3-A20 p<0.0001<br>ICH vs ICH+P7C3-A20 p=0.0091<br>Sirt3 <sup>CKO</sup> ; Sham vs ICH p<0.0001<br>Sham vs ICH+P7C3-A20 p<0.0001                                 |

ICH vs ICH+P7C3-A20 p=0.1051

| Figure7   | n                                   | Data structure                                                                 | Test used                                    | Statistic       | P value                                                                                     |
|-----------|-------------------------------------|--------------------------------------------------------------------------------|----------------------------------------------|-----------------|---------------------------------------------------------------------------------------------|
| 7B        | Sirt3 <sup>fl/fl</sup> : Sham=6     | Normal distribution                                                            | 2-way repeated ANOVA,<br>Bonferroni post hoc | F(2, 15)=175.0  | P<0.0001                                                                                    |
|           | ICH=6                               |                                                                                |                                              |                 | Sirt3 <sup>fl/fl</sup> : Sham vs ICH p<0.0001                                               |
|           | ICH+P7C3-A20=6                      |                                                                                |                                              |                 | Sham vs ICH+P7C3-A20 p<0.0001                                                               |
|           | Sirt3 <sup>CKO</sup> : Sham=6       |                                                                                |                                              |                 | ICH vs ICH+P7C3-A20 p=0.0038                                                                |
|           | ICH=6                               |                                                                                |                                              |                 | Sirt3 <sup>CKO</sup> : Sham vs ICH p<0.0001                                                 |
|           | ICH+P7C3-A20=6                      |                                                                                |                                              |                 | Sham vs ICH+P7C3-A20 p<0.0001<br>ICH vs ICH+P7C3-A20 p=0.1296                               |
| 7C        | Sirt3 <sup>fl/fl</sup> : Sham=6     | Normal distribution                                                            | 2-way repeated ANOVA,<br>Bonferroni post hoc | F(2, 15)=104.7  | P<0.0001                                                                                    |
|           | ICH=6                               |                                                                                |                                              |                 | Sirt3 <sup>fl/fl</sup> : Sham vs ICH p<0.0001                                               |
|           | ICH+P7C3-A20=6                      |                                                                                |                                              |                 | Sham vs ICH+P7C3-A20 p<0.0001                                                               |
|           | Sirt3 <sup>CKO</sup> : Sham=6       |                                                                                |                                              |                 | ICH vs ICH+P7C3-A20 p=0.0439                                                                |
|           | ICH=6                               |                                                                                |                                              |                 | Sirt3 <sup>CKO</sup> : Sham vs ICH p<0.0001                                                 |
|           | ICH+P7C3-A20=6                      |                                                                                |                                              |                 | Sham vs ICH+P7C3-A20 p<0.0001<br>ICH vs ICH+P7C3-A20 p=0.4851                               |
| 7D        | Sirt3 <sup>fl/fl</sup> : ICH=6      | Normal distribution                                                            | 2-way repeated ANOVA,<br>Bonferroni post hoc | F(3, 20)=4.352  | P=0.0163                                                                                    |
|           | ICH+P7C3-A20=6                      |                                                                                |                                              |                 | Sirt3 <sup>fl/fl</sup> +ICH+P7C3-A20 vs                                                     |
|           | Sirt3 <sup>CKO</sup> : ICH=6        |                                                                                |                                              |                 | Sirt3 <sup>CKO</sup> +ICH+P7C3-A20 p=0.0491                                                 |
|           | ICH+P7C3-A20=6                      |                                                                                |                                              |                 | D7: Sirt3 <sup>fl/fl</sup> +ICH+P7C3-A20 vs<br>Sirt3 <sup>CKO</sup> +ICH+P7C3-A20 p=0.0319  |
| 7E        | Sirt3 <sup>fl/fl</sup> : ICH=6      | Non-normal distribution                                                        | 2-way repeated ANOVA,<br>Bonferroni post hoc | F(3, 20)=7.121  | P=0.0019                                                                                    |
|           | ICH+P7C3-A20=6                      |                                                                                |                                              |                 | Sirt3 <sup>fl/fl</sup> +ICH+P7C3-A20 vs                                                     |
|           | Sirt3 <sup>CKO</sup> : ICH=6        |                                                                                |                                              |                 | Sirt3 <sup>CKO</sup> +ICH+P7C3-A20 p=0.0362                                                 |
|           | ICH+P7C3-A20=6                      |                                                                                |                                              |                 | D14: Sirt3 <sup>fl/fl</sup> +ICH+P7C3-A20 vs<br>Sirt3 <sup>CKO</sup> +ICH+P7C3-A20 p=0.0438 |
| 7F        | Sirt3 <sup>fl/fl</sup> : ICH=6      | Normal distribution                                                            | 2-way repeated ANOVA,<br>Bonferroni post hoc | F(3, 20)=5.597  | P=0.0059                                                                                    |
|           | ICH+P7C3-A20=6                      |                                                                                |                                              |                 | Sirt3 <sup>fl/fl</sup> +ICH+P7C3-A20 vs                                                     |
|           | Sirt3 <sup>CKO</sup> : ICH=6        |                                                                                |                                              |                 | Sirt3 <sup>CKO</sup> +ICH+P7C3-A20 p=0.032                                                  |
|           | ICH+P7C3-A20=6                      |                                                                                |                                              |                 | D14: Sirt3 <sup>fl/fl</sup> +ICH+P7C3-A20 vs<br>Sirt3 <sup>CKO</sup> +ICH+P7C3-A20 p=0.0438 |
| 7G        | Sirt3 <sup>fl/fl</sup> : ICH=6      | Normal distribution                                                            | 2-way repeated ANOVA,<br>Bonferroni post hoc | F(3, 20)=6.376  | P=0.0033                                                                                    |
|           | ICH+P7C3-A20=6                      |                                                                                |                                              |                 | Sirt3 <sup>fl/fl</sup> +ICH+P7C3-A20 vs                                                     |
|           | Sirt3 <sup>CKO</sup> : ICH=6        |                                                                                |                                              |                 | Sirt3 <sup>CKO</sup> +ICH+P7C3-A20 p=0.0495                                                 |
|           | ICH+P7C3-A20=6                      |                                                                                |                                              |                 | D7: Sirt3 <sup>fl/fl</sup> +ICH+P7C3-A20 vs<br>Sirt3 <sup>CKO</sup> +ICH+P7C3-A20 p=0.0295  |
| Figure8   | n                                   | Data structure                                                                 | Test used                                    | Statistic       | P value                                                                                     |
| 8A        | Favorable group=47<br>Poor group=29 | Normal distribution                                                            | t test with Welch's correction               | t[73.84]=7.202  | P<0.0001                                                                                    |
| 8C        | N=76                                | Plasma NAD <sup>+</sup> :<br>Normal distribution,<br>MRS: rating scale(0 to 5) | Spearman correlation                         | R[74] = -0.6581 | P<0.0001                                                                                    |
| Figure S2 | n                                   | Data structure                                                                 | Test used                                    | Statistic       | P value                                                                                     |

|                             |                             |                       |                                     |                  |                                          |
|-----------------------------|-----------------------------|-----------------------|-------------------------------------|------------------|------------------------------------------|
| SF2B                        | Sham=6                      | Normal distribution   | 1-way ANOVA,<br>Bonferroni post hoc | F(4, 25)=17.22   | P<0.0001                                 |
|                             | ICH=6                       |                       |                                     |                  | Sham vs ICH p<0.0001                     |
|                             | ICH+P7C3-A20<br>(5mg/kg)=6  |                       |                                     |                  | ICH vs ICH+P7C3-A20(5mg/kg)<br>P=0.0595  |
|                             | ICH+P7C3-A20<br>(10mg/kg)=6 |                       |                                     |                  | ICH vs ICH+P7C3-A20(10mg/kg)<br>p<0.0001 |
| ICH+P7C3-A20<br>(20mg/kg)=6 |                             |                       |                                     |                  | ICH vs ICH+P7C3-A20(20mg/kg)<br>p<0.0001 |
| SF2C                        | Sham=6                      | Normal distribution   | 1-way ANOVA,<br>Bonferroni post hoc | F(4, 25)=76.21   | P<0.0001                                 |
|                             | ICH=6                       |                       |                                     |                  | Sham vs ICH p<0.0001                     |
|                             | ICH+P7C3-A20<br>(5mg/kg)=6  |                       |                                     |                  | ICH vs ICH+P7C3-A20(5mg/kg)<br>P=0.0255  |
|                             | ICH+P7C3-A20<br>(10mg/kg)=6 |                       |                                     |                  | ICH vs ICH+P7C3-A20(10mg/kg)<br>p<0.0001 |
| ICH+P7C3-A20<br>(20mg/kg)=6 |                             |                       |                                     |                  | ICH vs ICH+P7C3-A20(20mg/kg)<br>p<0.0001 |
| <b>Figure S3</b>            | <b>n</b>                    | <b>Data structure</b> | <b>Test used</b>                    | <b>Statistic</b> | <b>P value</b>                           |
| SF3A                        | Sham=6                      | Normal distribution   | 1-way ANOVA,<br>Bonferroni post hoc | F(2, 15)=142.2   | P<0.0001                                 |
|                             | ICH=6                       |                       |                                     |                  | Sham vs ICH p<0.0001                     |
|                             | ICH+P7C3-A20=6              |                       |                                     |                  | ICH vs ICH+P7C3-A20 p<0.0001             |
| SF3B                        | Sham=6                      | Normal distribution   | 1-way ANOVA,<br>Bonferroni post hoc | F(2, 15)=257.8   | P<0.0001                                 |
|                             | ICH=6                       |                       |                                     |                  | Sham vs ICH p<0.0001                     |
|                             | ICH+P7C3-A20=6              |                       |                                     |                  | ICH vs ICH+P7C3-A20 p<0.0001             |
| SF3C                        | Sham=6                      | Normal distribution   | 1-way ANOVA,<br>Bonferroni post hoc | F(2, 15)=8.703   | P=0.0031                                 |
|                             | ICH=6                       |                       |                                     |                  | Sham vs ICH p=0.0040                     |
|                             | ICH+P7C3-A20=6              |                       |                                     |                  | ICH vs ICH+P7C3-A20 p=0.0186             |
| SF3D                        | Sham=6                      | Normal distribution   | 1-way ANOVA,<br>Bonferroni post hoc | F(2, 15)=30.34   | P<0.0001                                 |
|                             | ICH=6                       |                       |                                     |                  | Sham vs ICH p<0.0001                     |
|                             | ICH+P7C3-A20=6              |                       |                                     |                  | ICH vs ICH+P7C3-A20 p<0.0001             |
| <b>Figure S4</b>            | <b>n</b>                    | <b>Data structure</b> | <b>Test used</b>                    | <b>Statistic</b> | <b>P value</b>                           |
| SF4B                        | Vehicle=6                   | Normal distribution   | 1-way ANOVA,<br>Bonferroni post hoc | F(3, 20)=27.12   | P<0.0001                                 |
|                             | ICH=6                       |                       |                                     |                  | Vehicle vs ICH p=0.0002                  |
|                             | ICH+P7C3-A20=6              |                       |                                     |                  | ICH vs ICH+P7C3-A20 p=0.2392             |
|                             | CCCP=6                      |                       |                                     |                  |                                          |
| SF4C                        | Vehicle=6                   | Normal distribution   | 1-way ANOVA,<br>Bonferroni post hoc | F(3, 20)=83.61   | P<0.0001                                 |
|                             | ICH=6                       |                       |                                     |                  | Vehicle vs ICH p<0.0001                  |
|                             | ICH+P7C3-A20=6              |                       |                                     |                  | ICH vs ICH+P7C3-A20 p=0.9555             |
|                             | CCCP=6                      |                       |                                     |                  |                                          |
| SF4D                        | Vehicle=6                   | Normal distribution   | 1-way ANOVA,<br>Bonferroni post hoc | F(3, 20)=40.17   | P<0.0001                                 |
|                             | ICH=6                       |                       |                                     |                  | Vehicle vs ICH p<0.0001                  |
|                             | ICH+P7C3-A20=6              |                       |                                     |                  | ICH vs ICH+P7C3-A20 p>0.9999             |
|                             | CCCP=6                      |                       |                                     |                  |                                          |
