# Supplementary material for: P7C3-A20 Attenuates Microglial Inflammation and Brain Injury after ICH through Activating the NAD+/Sirt3 Pathway
Source: Hindawi journal article supplement (doi:10.1155/2023/7857760), 2023-02-08

# Supplementary Fig. 3

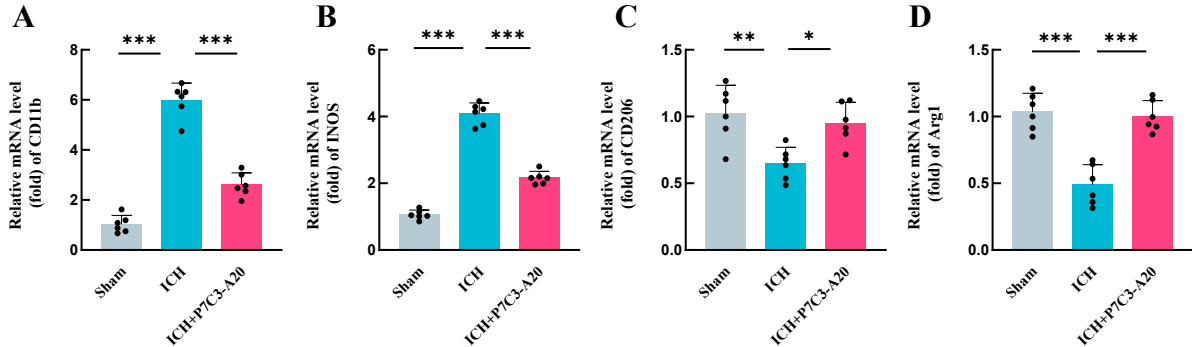

Supplement: f5 [file 7857760.f5.pdf]
